1 **CRISPR-Cas9 gene editing and rapid detection of gene-edited mutants using high-resolution**  
2 **melting in the apple scab fungus, *Venturia inaequalis***

3

4 **Mercedes Rocafort<sup>1</sup>, Saadiah Arshed<sup>2</sup>, Debbie Hudson<sup>3</sup>, Jaspreet Singh<sup>3</sup>, Joanna K. Bowen<sup>2</sup>,**  
5 **Kim M. Plummer<sup>4</sup>, Rosie E. Bradshaw<sup>5,6</sup>, Richard D. Johnson<sup>3</sup>, Linda J. Johnson<sup>3</sup> and Carl H.**  
6 **Mesarich<sup>1,6,\*</sup>**

7

8 <sup>1</sup>Laboratory of Molecular Plant Pathology, School of Agriculture and Environment, Massey  
9 University, Palmerston North 4410, New Zealand.

10 <sup>2</sup>The New Zealand Institute for Plant and Food Research Limited, Mount Albert Research  
11 Centre, Auckland 1025, New Zealand.

12 <sup>3</sup>Grasslands Research Centre, AgResearch Limited, Palmerston North 4410, New Zealand.

13 <sup>4</sup>Department of Animal, Plant and Soil Sciences, La Trobe University, AgriBio, Centre for  
14 AgriBiosciences, La Trobe University, Bundoora, Victoria 3086, Australia.

15 <sup>5</sup>Laboratory of Molecular Plant Pathology, School of Fundamental Sciences, Massey  
16 University, Palmerston North 4410, New Zealand.

17 <sup>6</sup>The New Zealand Bio-Protection Research Centre, Massey University, Palmerston North  
18 4410, New Zealand.

19

20 \*Corresponding author: Carl H. Mesarich: [c.mesarich@massey.ac.nz](mailto:c.mesarich@massey.ac.nz)

21

22

23

24

25 **Abstract**

26 **Background:** Scab, or black spot, caused by the filamentous fungal pathogen *Venturia*  
27 *inaequalis*, is the most economically important disease of apple (*Malus x domestica*)  
28 worldwide. To develop durable control strategies against this disease, a better understanding  
29 of the genetic mechanisms underlying the growth, reproduction, virulence and pathogenicity  
30 of *V. inaequalis* is required. A major bottleneck for the genetic characterization of *V.*  
31 *inaequalis* is the inability to easily delete or disrupt genes of interest using homologous  
32 recombination. Indeed, no gene deletions or disruptions in *V. inaequalis* have yet been  
33 published. Recently, CRISPR-Cas9 has emerged as an efficient tool for gene editing in  
34 filamentous fungi. With this in mind, we set out to establish CRISPR-Cas9 as a gene editing  
35 tool in *V. inaequalis*.

36 **Results:** We showed that CRISPR-Cas9 can be used for gene inactivation in the apple scab  
37 fungus. As a proof of concept, we targeted the melanin biosynthesis pathway gene  
38 *trihydroxynaphthalene reductase (THN)*, which has previously been shown to result in a light-  
39 brown colony phenotype when transcriptionally silenced using RNA interference. Using one  
40 of two CRISPR-Cas9 single guide RNAs (sgRNAs) targeted to the *THN* gene, delivered by a  
41 single autonomously replicating Golden Gate-compatible plasmid, we were able to identify  
42 six of 36 stable transformants with a light-brown phenotype, indicating an ~16.7% gene  
43 inactivation efficiency. Notably, of these six *THN* mutants, five had an independent mutation.  
44 As part of our pipeline, we also report a high-resolution melting (HRM) curve protocol for the  
45 rapid detection of CRISPR-Cas9 gene-edited mutants of *V. inaequalis*. This protocol identified  
46 a single base pair deletion mutation in a sample containing only 5% mutant genomic DNA,  
47 indicating high sensitivity for mutant screening.

48 **Conclusions:** In establishing CRISPR-Cas9 as a tool for gene editing in *V. inaequalis*, we have  
49 provided a strong starting point for studies aiming to decipher the function of genes  
50 associated with the growth, reproduction, virulence and pathogenicity of this fungus. The  
51 associated HRM curve protocol will enable CRISPR-Cas9 transformants to be screened for  
52 gene inactivation in a high-throughput and low-cost manner, which will be particularly  
53 powerful in cases where the CRISPR-Cas9-mediated gene inactivation efficiency is low.

54

#### 55 **Keywords**

56 CRISPR-Cas9, gene editing, *Venturia inaequalis*, apple scab, apple black spot, high-resolution  
57 melting (HRM) curve analysis, *trihydroxynaphthalene reductase (THN)* gene, melanin  
58 biosynthesis pathway disruption.

59

#### 60 **Introduction**

61 Fungal species from the *Venturia* genus are devastating plant pathogens of economically  
62 important crops that mainly belong to the *Rosaceae* (1-3). The best researched of these  
63 pathogens is *Venturia inaequalis*, which causes scab, or black spot, the most economically  
64 important disease of apple (*Malus x domestica*) worldwide (1). Under favourable conditions,  
65 this disease can result in 70% or more of the crop being lost, as scab renders the apples  
66 unmarketable (i.e. through blemishes and deformation), and reduces both the growth and  
67 yield of the plant (i.e. by causing repeated defoliation of trees over several seasons) (1, 3, 4).  
68 To develop durable control strategies against scab disease, a better understanding of the

69 genetic mechanisms underlying the growth, reproduction, virulence and pathogenicity of  
70 *V. inaequalis* is required.

71 A key development over recent years has been the availability of several *V. inaequalis*  
72 genome sequences and gene catalogues (2, 5-9), as well as the development of both  
73 polyethylene glycol (PEG)-mediated protoplast and *Agrobacterium tumefaciens*-mediated  
74 transformation protocols for use with this fungus (10). However, while several *V. inaequalis*  
75 genes of interest that are putatively involved in the infection process of apple have been  
76 identified (5, 11-15), none have been functionally characterized to date using traditional gene  
77 deletion or disruption techniques. Indeed, no gene deletions or disruptions, based on  
78 homologous recombination, have yet been reported for *V. inaequalis* in the literature. This  
79 suggests that gene deletion or disruption by traditional homologous recombination is  
80 extremely inefficient in *V. inaequalis*. It should be noted that transcriptional silencing of  
81 multiple genes in *V. inaequalis* has been achieved using RNA interference (RNAi) (16).  
82 However, RNAi does not typically silence a gene to completion and the observed phenotypes  
83 can be inconsistent, unclear or absent, making it difficult to determine function (17, 18).  
84 Taken together, alternative gene disruption and deletion tools, such as the Clustered  
85 Regularly Interspaced Short Palindromic Repeats-Cas9 (CRISPR-Cas9) system (19), are  
86 desperately needed to assess gene function in *V. inaequalis*.

87 The CRISPR-Cas9 system is a powerful tool for gene editing that has been established  
88 in many species of filamentous plant-pathogenic microbes. Indeed, CRISPR-Cas9 has been  
89 used to generate gene inactivations in more than 40 species of filamentous fungi and  
90 oomycetes (20), including *Phytophthora sojae* (21), *Magnaporthe oryzae* (22), *Ustilago*  
91 *maydis* (23) and a fungus that is closely related to *V. inaequalis*, *Leptosphaeria maculans* (24).

92 The CRISPR-Cas9 gene editing system requires two components: the Cas9 endonuclease and  
93 a single guide RNA (sgRNA). The Cas9 endonuclease is an RNA-guided enzyme that generates  
94 a double strand break (DSB) in the genome. The sgRNA consists of a protospacer sequence of  
95 20 nucleotides at the 5' end that targets specific DNA by base pairing, and an 80-nucleotide  
96 scaffold structure that binds to Cas9. The sgRNA-Cas9 complex only cleaves the target DNA if  
97 it is flanked by a protospacer motif (PAM) (19).

98 After the Cas9 endonuclease generates a DSB in the target DNA, DNA repair  
99 mechanisms are activated (19, 25). The DNA can be repaired by a non-homologous end-  
100 joining mechanism (NHEJ) or homology-directed repair (HDR), although NHEJ is usually the  
101 dominant DNA repair pathway in fungi (26). DNA repair by NHEJ is error-prone and is likely to  
102 introduce small insertions/deletions (indels) or nucleotide substitutions, which can lead to  
103 frameshift mutations that cause a gene disruption (25). Alternatively, a double-stranded DNA  
104 template (donor DNA), usually harbouring a selectable marker, can be introduced to use as a  
105 repair template for HDR.

106 Traditionally, screening for the identification of mutants generated by the CRISPR-  
107 Cas9 system can be achieved using an enzymatic mismatch cleavage (EMC) method (27) or a  
108 polyacrylamide gel electrophoresis (PAGE)-based method (28) that both rely on the detection  
109 of DNA heteroduplexes. Both EMC and PAGE detect large indels with a similar efficiency;  
110 however, the sensitivity with which they detect small indels (i.e. the type of indels that are  
111 usually generated by CRISPR-Cas9 DSB) is low (27-29). Alternatively, CRISPR-Cas9 mutants can  
112 be identified by amplicon sequencing, which is a tedious and expensive process. High-  
113 resolution melting (HRM) curve analysis is a fluorescence-based technique that measures the  
114 melting temperature of double- stranded DNA and, in doing so, can discriminate between

115 amplicons with different melting temperatures (30-32). HRM curve analysis has been widely  
116 used to identify mutations and single nucleotide polymorphisms in various genes (30, 33), and  
117 has recently been used to reliably identify CRISPR-Cas9-mediated base pair (bp) indels in  
118 plants (29, 34). To date, even though HRM curve analyses are largely used for fungal species  
119 identification, to our knowledge, an HRM curve analysis has not yet been employed to screen  
120 for CRISPR-Cas9-generated mutants in fungi.

121 In this study, we set out to establish the CRISPR-Cas9 gene editing system in  
122 *V. inaequalis*. For this purpose, we first generated the Golden Gate-compatible plasmid  
123 Cas9HygAMAccdB by modifying the previously published Cas9 autonomously replicating  
124 plasmid ANEp8\_Cas9\_LIC1 (35). Here, Golden Gate-compatibility was chosen as it enabled the  
125 introduction of a sgRNA into Cas9HygAMAccdB using a single step, facilitating the creation of  
126 a Cas9HygAMA-sgRNA plasmid in less than one week. Next, using the melanin biosynthesis  
127 pathway gene *trihydroxynaphthalene reductase (THN)* as a proof of concept, we showed, in  
128 conjunction with the Cas9HygAMA-sgRNA plasmid, that the CRISPR-Cas9 gene editing system  
129 can be successfully applied to *V. inaequalis*. As part of this process, we also established a  
130 method based on an HRM curve analysis for the high-throughput screening of CRISPR-Cas9  
131 gene-edited mutants of *V. inaequalis*.

132

## 133 **Results and discussion**

### 134 **CRISPR-Cas9 can be used for gene disruption in *V. inaequalis***

135 We set out to establish the CRISPR-Cas9 gene editing system in *V. inaequalis*, using the  
136 melanin biosynthesis pathway gene *THN* (Joint Genome Institute ID: *atg4736.t1*) as a target

137 for inactivation. The *THN* gene was chosen as a proof of concept, as a previous study had  
138 shown that *V. inaequalis* displays a distinctive light-brown phenotype when this gene is  
139 transcriptionally silenced using RNAi, indicative of reduced melanisation (16). In this way,  
140 transformants of *V. inaequalis* inactivated for the *THN* gene using the CRISPR-Cas9 gene  
141 editing system can be rapidly identified through a simple visual screen. For ease of use, we  
142 chose to employ a CRISPR-Cas9 gene editing system that, similar to the one previously  
143 established in *Aspergillus niger* (35), only requires a single autonomously replicating plasmid,  
144 Cas9HygAMAcdb (containing both the Cas9 endonuclease and sgRNA), for gene inactivation.

145 The Cas9HygAMAcdb plasmid contains an *A. niger* codon-optimized *cas9* gene  
146 expressed under the control of the *pkiA* (*pyruvate kinase*) promoter. To ensure expression in  
147 the fungal nucleus, the Cas9 endonuclease was tagged at its carboxyl (C) terminus with a  
148 nuclear localization signal (NLS). The Cas9HygAMAcdb plasmid also contains an RNA  
149 polymerase III promoter to facilitate expression of the sgRNA *in vivo*. Using the chosen  
150 CRISPR-Cas9 system, the 20 nucleotides of the sgRNA protospacer were synthesized as two  
151 pairs of complementary oligonucleotides that were pre-annealed and cloned into  
152 Cas9HygAMAcdb by a single-step Golden Gate reaction, enabling Polymerase Chain Reaction  
153 (PCR)-free cloning that could be completed in less than one week.

154 An autonomously replicating plasmid was chosen as it has several advantages. Firstly,  
155 autonomously replicating plasmids can enhance fungal transformation efficiency, as  
156 recombination between the plasmid and chromosome is not required (36). As such,  
157 autonomously replicating plasmids can be used in fungal species that exhibit low  
158 transformation efficiency, such as *V. inaequalis*. Secondly, autonomously replicating plasmids  
159 could be lost once selection (e.g., as mediated through hygromycin B) is removed (36). In

160 doing so, autonomously replicating plasmids can reduce off-target effects by only enabling  
161 transient expression of the Cas9 endonuclease in the fungus (37). As such, autonomously  
162 replicating plasmids could be recycled, which would enable the sequential inactivation of  
163 genes in CRISPR-Cas9 gene-edited mutants and could also facilitate the subsequent  
164 complementation of mutants generated using CRISPR-Cas9 technology.

165 As a starting point for inactivation, sgRNAs were designed to target the amino (N)  
166 terminus (first and second exon) instead of the C terminus of the *THN* gene. This is because  
167 mutations at the C terminus of a gene are less likely to cause a frameshift mutation that  
168 results in inactivation (38). As different sgRNAs can display different targeting efficiencies  
169 (38), two different sgRNAs, sgRNA 4 and sgRNA 20, with similar predicted on-target activity,  
170 and no predicted off-target activity (Table 1), were selected for inactivation of the *THN* gene.  
171 Special attention was taken to ensure that the sgRNAs did not target any other melanin  
172 biosynthesis pathway genes that have a high degree of conservation to *THN*, such as the  
173 *1,3,6,8-tetrahydroxynaphthalene reductase* gene (Joint Genome Institute ID: *atg3631.t1*).  
174 PEG-mediated protoplast transformation of *V. inaequalis* with sgRNA 4, targeting the first  
175 *THN* exon (Figure 1.A), resulted in 98 independent transformants, of which 62 ceased to grow  
176 on hygromycin B selection media after one week, and were therefore considered transient,  
177 giving a final number of 36 stable transformants. Transient transformants have been reported  
178 in a large number of PEG-mediated protoplast transformations of fungi (39, 40), and it has  
179 previously been reported that up to 98% of PEG-mediated protoplast transformants of  
180 *V. inaequalis* are transient (10). Of course, it remains possible that the large number of  
181 transient transformants generated in our study was the result of premature loss of the  
182 autonomously replicating plasmid used to deliver the sgRNA and Cas9.



183           Notably, of the 36 stable transformants, six had a light-brown phenotype (Figure 1.B).  
184   These were transformants THN #9, THN #37, THN #60, THN #66, THN #89 and THN #96. To  
185   validate the presence of a mutation in the *THN* gene, it was amplified from each of the six  
186   putative mutants by PCR, as well as from three dark-brown transformants without the light-  
187   brown phenotype (THN #38, THN #53 and THN #90), and subjected to amplicon sequencing.  
188   As expected, all three dark-brown transformants did not contain a mutation in their *THN* gene  
189   (Figure 1.C). For the putative light-brown mutant THN #9, the *THN* gene could not be  
190   amplified by PCR using two different sets of primers (MR161-MR162, MR185-MR186). This  
191   was despite the fact that both *THN*-flanking genes could be amplified, suggesting that a large  
192   deletion at the *THN* locus might have occurred (Figure S1). In contrast to the dark-brown  
193   transformants, the remaining light-brown *THN* transformants displayed a range of mutations.  
194   More specifically, these were a single bp insertion (T) at the same location in THN #37 and  
195   THN #66, a 33-bp deletion (TTTGGAGGGCAAGGTCGCCCTCGTTACCGGTTC) in THN #60, a single  
196   bp deletion (T) in THN #89, and a 24-bp deletion (TCATGGTCTTTGGAGGGCAAGGTC) in THN  
197   #96. Therefore, from the 36 stable transformants, six had a confirmed mutation, giving a gene  
198   inactivation efficiency of ~16.7%.

199           CRISPR-Cas9 gene inactivation efficiencies in other filamentous fungi, in experiments  
200   that rely on NHEJ, range between 10 and 100% (22, 23, 41-43). In cases where the CRISPR-  
201   Cas9 NHEJ-based gene inactivation efficiency is low, the gene inactivation efficiency could be  
202   improved greatly by the incorporation of a donor DNA that is integrated into the genome  
203   using HDR (22). Nevertheless, gene inactivation efficiencies between experiments cannot be  
204   compared, as these efficiencies will greatly depend on Cas9 expression, sgRNA design and  
205   accessibility of the target gene, among other factors (20). Therefore, even though the  
206   inactivation efficiency of the *V. inaequalis THN* gene with sgRNA 4 is at the low end, it is likely

207 to vary between genes and no conclusions can yet be drawn as to the overall efficiency of the  
208 technique.

209 Remarkably, PEG-mediated protoplast transformation of *V. inaequalis* with sgRNA 20,  
210 targeting the second exon of the *THN* gene (Figure 1.A), resulted in a similar number of stable  
211 independent transformants on hygromycin B selection media (31 in total), but none of these  
212 transformants had the distinctive light-brown phenotype. This stark difference in the number  
213 of transformants inactivated for the *THN* gene is interesting, given that both sgRNAs had a  
214 similar predicted on-target activity score (Table 1). However, different sgRNAs can vary  
215 greatly in efficiency, as with that previously observed for the *yA* gene of the filamentous  
216 fungus *A. nidulans* (44), highlighting the importance of reliable methods to estimate sgRNA  
217 efficiency. Thus, while genes will differ in their ability to be inactivated using the CRISPR-Cas9  
218 gene editing system (e.g. due to their location in the genome) (20), it is important that future  
219 studies consider multiple sgRNAs for successful gene inactivation in *V. inaequalis*.

220 **Table 1:** Selected sgRNA protospacers used to target the *Venturia inaequalis* melanin  
221 biosynthesis pathway gene *trihydroxynaphthalene reductase* (*THN*).

|                       | Sequence (5'–3') <sup>1</sup> | Binding site | Direction | Off-targets <sup>2</sup> | Off-target score <sup>3</sup> | On-target score <sup>4</sup> |
|-----------------------|-------------------------------|--------------|-----------|--------------------------|-------------------------------|------------------------------|
| <b>Protospacer 4</b>  | GCCCCATCATGGT<br>CTTTGGAGGG   | Exon 1       | Forward   | 0 (0 in CDS)             | 100%                          | 0.448                        |
| <b>Protospacer 20</b> | TTTCAAGGACGTC<br>ACACCAGAGG   | Exon 2       | Forward   | 0 (0 in CDS)             | 100%                          | 0.539                        |

222 <sup>1</sup>NGG: protospacer adjacent motif (PAM) site.

223 <sup>2</sup>CDS: coding sequence.

224 <sup>3</sup>Off-target score: prediction of how likely a sgRNA sequence might bind to somewhere else  
225 in the genome. Scores are between 0 and 100, with higher scores indicative of less off-target  
226 activity.

227 <sup>4</sup>On-target scores are between 0 and 1, with higher scores indicative of higher expected  
228 activity of the sgRNA-Cas9 complex on the target gene, based on (38).

229

A.

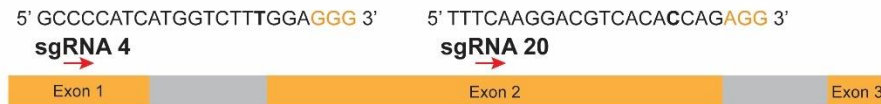

B.

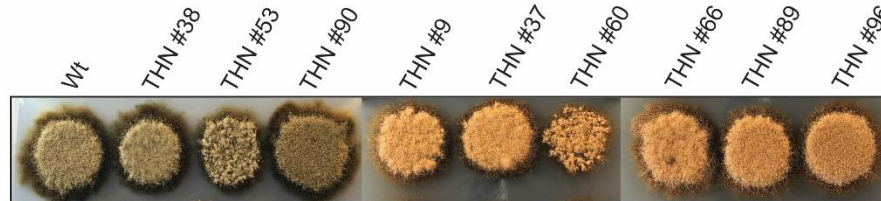

C.

|                |                                                                                  |                                                                                           |
|----------------|----------------------------------------------------------------------------------|-------------------------------------------------------------------------------------------|
| Dark-brown     | <b>Wt</b>                                                                        | ATGGCATCTGACGCCCCATCATGGTCTTTGGA <b>GGG</b> CAAGGTCGCCCTCGTTACCGGTTCCGGTATGTTCC           |
|                |                                                                                  | M A S D A P S W S L E G K V A L V T G S                                                   |
|                | <b>THN #38</b>                                                                   | ATGGCATCTGACGCCCCATCATGGTCTTTGGA <b>GGG</b> CAAGGTCGCCCTCGTTACCGGTTCCGGTATGTTCC           |
|                |                                                                                  | M A S D A P S W S L E G K V A L V T G S                                                   |
|                | <b>THN #53</b>                                                                   | ATGGCATCTGACGCCCCATCATGGTCTTTGGA <b>GGG</b> CAAGGTCGCCCTCGTTACCGGTTCCGGTATGTTCC           |
|                |                                                                                  | M A S D A P S W S L E G K V A L V T G S                                                   |
|                | <b>THN #90</b>                                                                   | ATGGCATCTGACGCCCCATCATGGTCTTTGGA <b>GGG</b> CAAGGTCGCCCTCGTTACCGGTTCCGGTATGTTCC           |
|                |                                                                                  | M A S D A P S W S L E G K V A L V T G S                                                   |
| Light-brown    | <b>THN #37</b>                                                                   | ATGGCATCTGACGCCCCATCATGGTCTTTGGA <b>GGG</b> CAAGGTCGCCCTCGTTACCGGTTCCGGTATGTTCC           |
|                |                                                                                  | M A S D A P S W S F G G Q G R P R Y R F                                                   |
|                | <b>THN #60</b>                                                                   | ATGGCATCTGACGCCCCATCATGGTC ————— CGGTATGTTCC                                              |
|                |                                                                                  | M A S D A P S W S                                                                         |
|                | <b>THN #66</b>                                                                   | ATGGCATCTGACGCCCCATCATGGTCTTTGGA <b>GGG</b> CAAGGTCGCCCTCGTTACCGGTTCCGGTATGTTCC           |
|                |                                                                                  | M A S D A P S W S F G G Q G R P R Y R F                                                   |
| <b>THN #89</b> | ATGGCATCTGACGCCCCATCATGGTCTT —GGA <b>GGG</b> CAAGGTCGCCCTCGTTACCGGTTCCGGTATGTTCC |                                                                                           |
|                | M A S D A P S W S W R A R S P S L P V P                                          |                                                                                           |
| <b>THN #96</b> | ATGGCATCTGACGCCCCA ————— GCCCTCGTTACCGGTTCCGGTATGTTCC                            |                                                                                           |
|                | M A S D A P A L V T G S                                                          |                                                                                           |
|                | <b>Positive control</b>                                                          | ATGGCATCTGACGCCCCATCATGG <b>GG</b> TTTGGAG <b>GGG</b> CAAGGTCGCCCTCGTTACCGGTTCCGGTATGTTCC |
|                |                                                                                  | M A S D A P S W G L E G K V A L V T G S                                                   |

230

231 **Figure 1. Establishment of the CRISPR-Cas9 gene editing system in *Venturia inaequalis*.** A.

232 Schematic representation of the *V. inaequalis* melanin biosynthesis pathway gene

233 *trihydroxynaphthalene reductase* (*THN*; 911 bp) with binding sites for the two selected

234 sgRNAs used in CRISPR-Cas9 gene editing experiments shown. Orange: gene exons; Grey:

235 gene introns; Bold nucleotides: expected sgRNA cleavage site; orange nucleotides: PAM site.

236 Arrows: binding direction of sgRNAs. B. Colony phenotype of wild type (wt) *V. inaequalis*, and

237 three dark-brown and six light-brown CRISPR-Cas9 transformants grown on potato-dextrose

238 agar at 22°C for 14 days. C. Spectrum of CRISPR-Cas9-generated mutations in the *THN* gene.

239 Black nucleotides: exon; Grey nucleotides: intron; Orange nucleotides: PAM site; Red amino

240 acids/nucleotides: mutations observed. Light-brown mutant THN #9 was not sequenced due

241 to a lack of PCR amplification for the *THN* gene.

242

243 **The autonomously replicating CRISPR-Cas9 gene editing plasmid is rapidly lost in most**  
244 **transformants once selection is removed**

245 With the finding that the CRISPR-Cas9 gene editing system could be successfully applied to  
246 *V. inaequalis*, we next set out to determine whether this fungus can lose the autonomously  
247 replicating plasmid, Cas9HygAMA-*sgRNA*, once the hygromycin B selection is removed. For  
248 this purpose, all six light-brown *THN* mutants (THN #9, THN #37, THN #60, THN #66, THN #89  
249 and THN #96), as well as three dark-brown transformants (THN #38, THN #53 and THN #90),  
250 all derived from the transformation of *V. inaequalis* with *sgRNA* 4, were single-spore purified  
251 and replica-plated onto both potato-dextrose agar (PDA) and PDA supplemented with 50  
252 µg/ml hygromycin B. After only one round of single-spore isolation and sub-culturing, four of  
253 the *THN* mutants (THN #60, THN #66, THN #89 and THN #96) and two of the transformants  
254 without the light-brown phenotype (THN #53 and THN #90) lost the Cas9HygAMA-*sgRNA*  
255 plasmid and were therefore unable to grow on PDA supplemented with hygromycin B,  
256 indicating loss of the Cas9HygAMA-*sgRNA* plasmid (Figure S2).

257

258 **High-resolution melting analysis is a sensitive and high-throughput method to screen for**  
259 **CRISPR-Cas9 mutants**

260 In our study, mutants of *V. inaequalis* with a CRISPR-Cas9-mediated gene inactivation of the  
261 *THN* gene could be rapidly identified based on their light-brown colony phenotype. However,  
262 not all genes of *V. inaequalis* will result in an observable phenotype when inactivated or  
263 mutated. For this reason, a low-cost, high-throughput method is required to rapidly identify  
264 CRISPR-Cas9 gene-edited mutants of *V. inaequalis* that lack an observable phenotype on a

265 transformation plate facilitating selection. One such method is an HRM curve analysis, which  
266 enables the rapid identification of single bp indels in DNA amplicons from transformant  
267 genomic DNA (30-32). We set out to test the efficiency of an HRM curve analysis for the  
268 detection of *V. inaequalis THN* mutants generated using CRISPR-Cas9 sgRNA 4. As a starting  
269 point for this analysis, we first generated a positive control sequence for detecting indels  
270 relative to the wild type (wt) sequence (Figure 1.C). The positive control was generated by  
271 introducing a two-nucleotide substitution into a PCR amplicon of the *THN* gene using site-  
272 directed mutagenesis.

273         According to the literature, an HRM curve analysis can be affected by different  
274 parameters such as genomic DNA quality, PCR amplicon size, amplicon GC content and  
275 fluorescent dye used (45). To ensure reliability of the assay, good quality genomic DNA should  
276 be extracted. Likewise, the same DNA preparation method should be used across all samples  
277 to ensure uniformity in genomic DNA quality. Amplicon size is another crucial parameter that  
278 affects the HRM curve analysis. Therefore, two different primer sets were designed to  
279 generate amplicons of 230 bp (MR170-MR171) and 123 bp (MR172-MR173) (Table 2). The  
280 HRM curve assay was performed with both primers sets using wt genomic DNA and the  
281 engineered positive control as DNA template. Specific DNA amplicons could be amplified  
282 using both primers sets (Figure 2.A); however, the smaller amplicon showed a clearer shift in  
283 the melting curve between wt and positive control (Figure 2.B). Given that smaller amplicons  
284 are more suitable for HRM curve analysis (45), and because the smaller amplicon showed a  
285 clearer shift in the melting curve, we decided to use the 123 bp amplicon for our screen  
286 (primer set MR172-MR173).

287

288 **Table 2. Oligonucleotides used in this study.** Bold sequence corresponds to the *SapI*  
 289 restriction site. Italicised sequence corresponds to the *NotI* restriction site. Bold italicized  
 290 sequence corresponds to the *KpnI* restriction site.

| Oligonucleotide name           | Oligonucleotide sequence (5'-3')                               |
|--------------------------------|----------------------------------------------------------------|
| MR135                          | <b>GTC</b> TTTCAAGGACGTCACACCAG                                |
| MR136                          | <b>AAC</b> TGGTGTGACGTCCTTGAAA                                 |
| MR137                          | <b>GTC</b> GCCCCATCATGGTCTTTGGA                                |
| MR138                          | <b>AAC</b> TCCAAAGACCATGATGGGGC                                |
| MR139                          | TTTTCTTCCATTACGC                                               |
| MR161                          | GTAGGGAGGTCCATTAGTG                                            |
| MR162                          | GGATAACACACTAGAGATA                                            |
| MR170                          | TTATAGTCGACCACCGCTCG                                           |
| MR171                          | CCACGACCTGTTGATTGCAT                                           |
| MR172                          | CCCACTACTAAACAAACTA                                            |
| MR173                          | TCGATTGACAAGAACATACC                                           |
| MR182                          | GCATCTGACGCCCCATCATGGGGTTT                                     |
| MR183                          | AAACCCCATGATGGGGCGTCAGATGC                                     |
| MR184                          | GCGAGAATGCAGAGAGTTGG                                           |
| MR185                          | GTGTGTGTCGCTGGATGATC                                           |
| MR204                          | CGCCAGCCTTCAATGCCAAT                                           |
| MR205                          | CATTGCGCCATCCCGATCTG                                           |
| MR252                          | CGTTGGCCAATCAGACGTCG                                           |
| MR253                          | GCCCAGAGCATCATCACCT                                            |
| <i>KpnI</i> TtrpC Hyg DONR R   | GCC <b><i>GGTACC</i></b> GCCTTACACAGTACACGAG                   |
| <i>NotI</i> PgpdA Hyg pDONR F  | AAGGAAAAAGCGCCGCCTAAAATCCGCCGCCTCCAC                           |
| <i>SapI</i> site CRISPR Fw P1  | GTCGGAAGAGCAAAT <b><i>GCTCTT</i></b> CAGTTTTAGAGCTAGAAATAGCAAG |
| <i>SapI</i> site CRISPR Rev P1 | AACTGAAGAGCATTTT <b><i>GCTCTT</i></b> CCGACGAGCTTACTCGTTTCG    |
| Fw LIC2                        | CAACCTCCAATCCAATTTGACTCCGCCGAACGTACTGG                         |
| Rev LIC2                       | ACTACTTACCCTATTTGAAAAGCAAAAAGGAAGGTACAAAAAGC                   |
| <i>SapI</i> ccdB F             | TCGGCTCGTCGGAAGAGCGACCGACAGCCTTCCAAATG                         |
| <i>SapI</i> ccdB R             | TCGCTAAAACCTGAAGAGCGTTGGCAGCATCACCCGACG                        |

291

292

A.

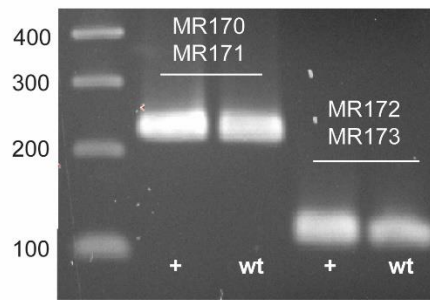

B.

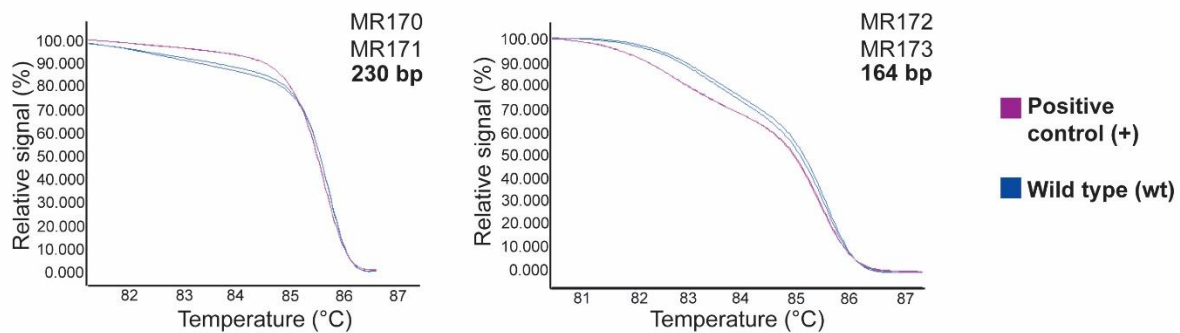

293

294 **Figure 2. Optimization of primers for qPCR-HRM curve analysis of the**  
295 ***trihydroxynaphthalene reductase (THN)* gene mutants generated using CRISPR-Cas9 sgRNA**  
296 **4. A.** Conventional PCR amplification of the *THN* gene positive control (+) and wild type (wt)  
297 sequences with the different primer sets resolved by electrophoresis on a 1.5% TBE agarose  
298 gel. Ladder sizes are shown in base pairs (bp). **B.** Normalized and shifted melting curves of the  
299 *THN* gene positive control (+) and wild type (wt) PCR amplicons generated with two different  
300 primer sets (MR170-MR171 and MR172-MR173).

301

302 Initially, the Bioline SensiFAST™ SYBR® No-ROX Kit fluorescent dye was tested to  
303 perform the HRM curve analysis; however, no differences between the wt and engineered  
304 positive control DNA could be detected (data not shown). It is known that the fluorescent dye  
305 used for an HRM curve analysis is crucial to ensure good assay sensitivity, and that high-  
306 saturating dyes designed to increase sensitivity are commercially available. With this in mind,  
307 the HRM was repeated using the AccuMelt HRM SuperMix high saturating dye SYTO 9™,  
308 resulting in clear separation of unique melting curves between mutants (Figure 3). The  
309 normalized HRM curves showed that amplicons from wt fungus, as well as dark-brown

310 transformants, clustered together into a group with a similar melting curve profile (blue  
311 curves in Figure 3). In contrast, amplicons from the engineered positive control (green curves  
312 in Figure 3) and the light-brown *THN* mutants showed distinct melting curves (green, red, grey  
313 and purple curves in Figure 3) that correlated with the different mutations seen in Figure 1.C.  
314 These results indicate that the HRM curve assay can not only efficiently identify CRISPR-Cas9  
315 gene-edited mutants, but can also discriminate between different mutations. The light-brown  
316 mutant THN #9 could not be screened using the HRM curve analysis due to a lack of PCR  
317 amplification for the *THN* gene, suggesting that a large deletion at the *THN* locus has been  
318 generated. This highlights one of the main limitations of the HRM curve analysis, in that it is  
319 not suitable for the detection of large deletion mutants. However, given that such deletion  
320 mutants can be easily assessed using standard PCR, this is not an issue.

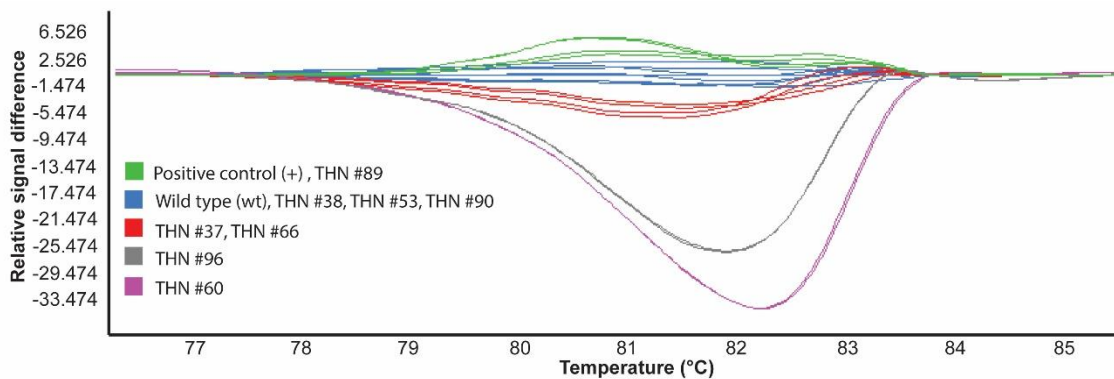

321 **Figure 3. Screening of CRISPR-Cas9 transformants of *Venturia inaequalis* using qPCR-HRM**  
322 **curve and PCR amplicon sequencing analyses.** Plot showing normalized and temperature-  
323 shifted differences in melting curves between *trihydroxynaphthalene reductase* (*THN*)  
324 amplicons of transformants. Melting curve groups were generated by LightCycler® 480 gene  
325 scanning software with a sensitivity of 0.40 and using AccuMelt HRM SuperMix fluorescent  
326 dye (DNAture). The experiment is based on two technical replicates per sample.  
327

328

329 One of the main advantages of the HRM curve analysis is that it can detect mutant  
330 DNA that is mixed in with wt DNA, even when the amount of mutant DNA is as low as 1–5%  
331 (29, 34). To test the efficiency of the HRM curve assay, genomic DNA from one mutant with a



332 single bp insertion (THN #66) was mixed with wt genomic DNA at different mutant:wt ratios  
333 (1:99, 5:95, 10:90, 20:80, 30:70 and 50:50), similarly to that performed by (29). Under our  
334 conditions, the assay could not differentiate mutant and wt in 1:99 mutant:wt ratio; however,  
335 the mutant DNA could be identified by the HRM curve analysis in all of the other ratios, with  
336 a clear shift in the melting curve, indicating an assay sensitivity as high as 5% (Figure 4).  
337 Therefore, mutants do not need to be single-spore purified before performing an HRM curve  
338 analysis, and multiple mutants can be pooled together for large-scale screens. The  
339 observation that mutant DNA can be detected when mixed with wt DNA further reduces the  
340 cost and workload of the assay, and further validates the use of an HRM curve analysis for the  
341 high throughput screening of CRISPR-Cas9 fungal transformants.

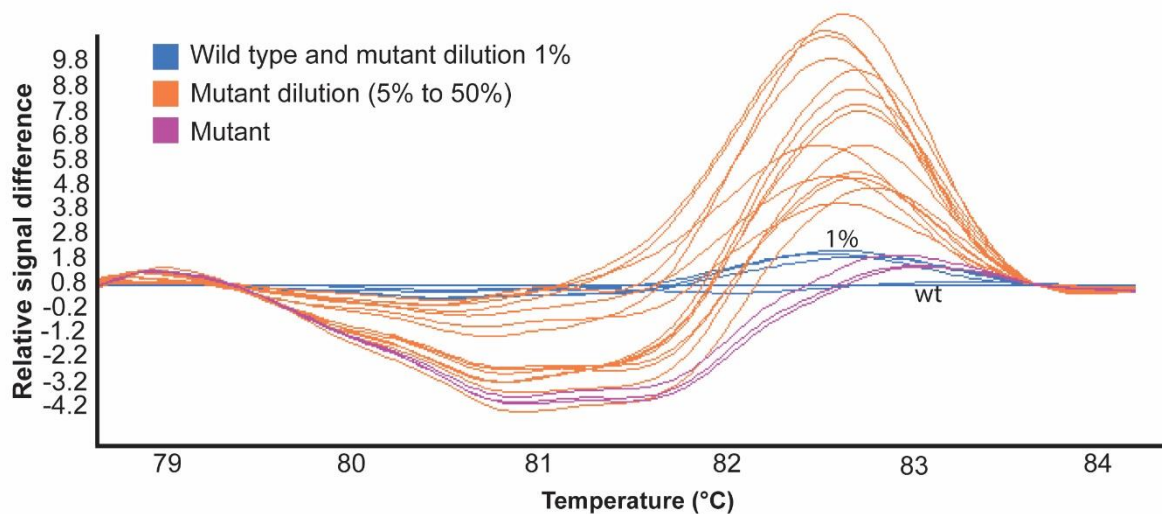

342

343 **Figure 4. qPCR-HRM sensitivity to detect a one base pair deletion in mutant-wild type DNA**  
344 **mixtures.** Plot showing normalized and temperature-shifted differences in melting curves  
345 between wild type (wt) *trihydroxynaphthalene reductase* (*THN*) DNA samples of *V. inaequalis*  
346 wt mixed with mutant *THN* DNA samples to detect the resolution limit of the HRM curve  
347 assay. Melting curve groups generated by LightCycler® 480 gene scanning software with a  
348 sensitivity of 0.48 and using AccuMelt HRM SuperMix fluorescent dye (DNAure). A minimum  
349 of two technical replicates were performed per sample. Wt genomic DNA and mutant *THN*  
350 #66 genomic DNA were diluted in different ratios (mutant:wt): 1:99, 5:95, 10:90, 20:80, 30:70  
351 and 50:50.

352

353 **CRISPR-Cas9 editing of the *THN* gene does not alter the phenotype of *V. inaequalis* grown**  
354 **in culture**

355 CRISPR-Cas9-based experiments can sometimes be detrimental to the target organism due to  
356 Cas9 toxicity and/or off-target mutations (46), even though CRISPR-Cas9 off-target mutations  
357 have been reported to be unlikely in different filamentous fungi (22, 23, 47). To test if CRISPR-  
358 Cas9-mediated transformation has greatly affected the phenotype of *V. inaequalis* (e.g.  
359 through toxicity or off-target effects), we investigated the phenotypes of the wt, three dark-  
360 brown transformants (THN #38, THN #53, THN #90) and six light-brown mutants (THN #9,  
361 THN#37, THN#60, THN#66, THN#89, THN#96) of *V. inaequalis* on and in cellophane  
362 membranes overlaying PDA. During growth in cellophane membranes, *V. inaequalis*  
363 undergoes morphological differentiation, similar to that observed under the cuticle *in planta*,  
364 where it develops infection structures called runner hyphae and stromata (12). Therefore, we  
365 investigated whether the *THN* mutants maintained their ability to develop runner hyphae and  
366 stromata in cellophane membranes after CRISPR-Cas9-mediated transformation (Figure 5).  
367 All mutants showed a similar phenotype to wt, in that they were able to penetrate the  
368 cellophane membrane to develop runner hyphae and stromata. Likewise, all mutants  
369 maintained their ability to sporulate on the cellophane membrane surface. Taken together,  
370 these results suggest that CRISPR-Cas9-mediated transformation has not greatly affected the  
371 phenotype of *V. inaequalis*. A more in-depth analysis based on whole genome sequencing is  
372 the next step to determine whether this experiment has resulted in any off-target mutations.

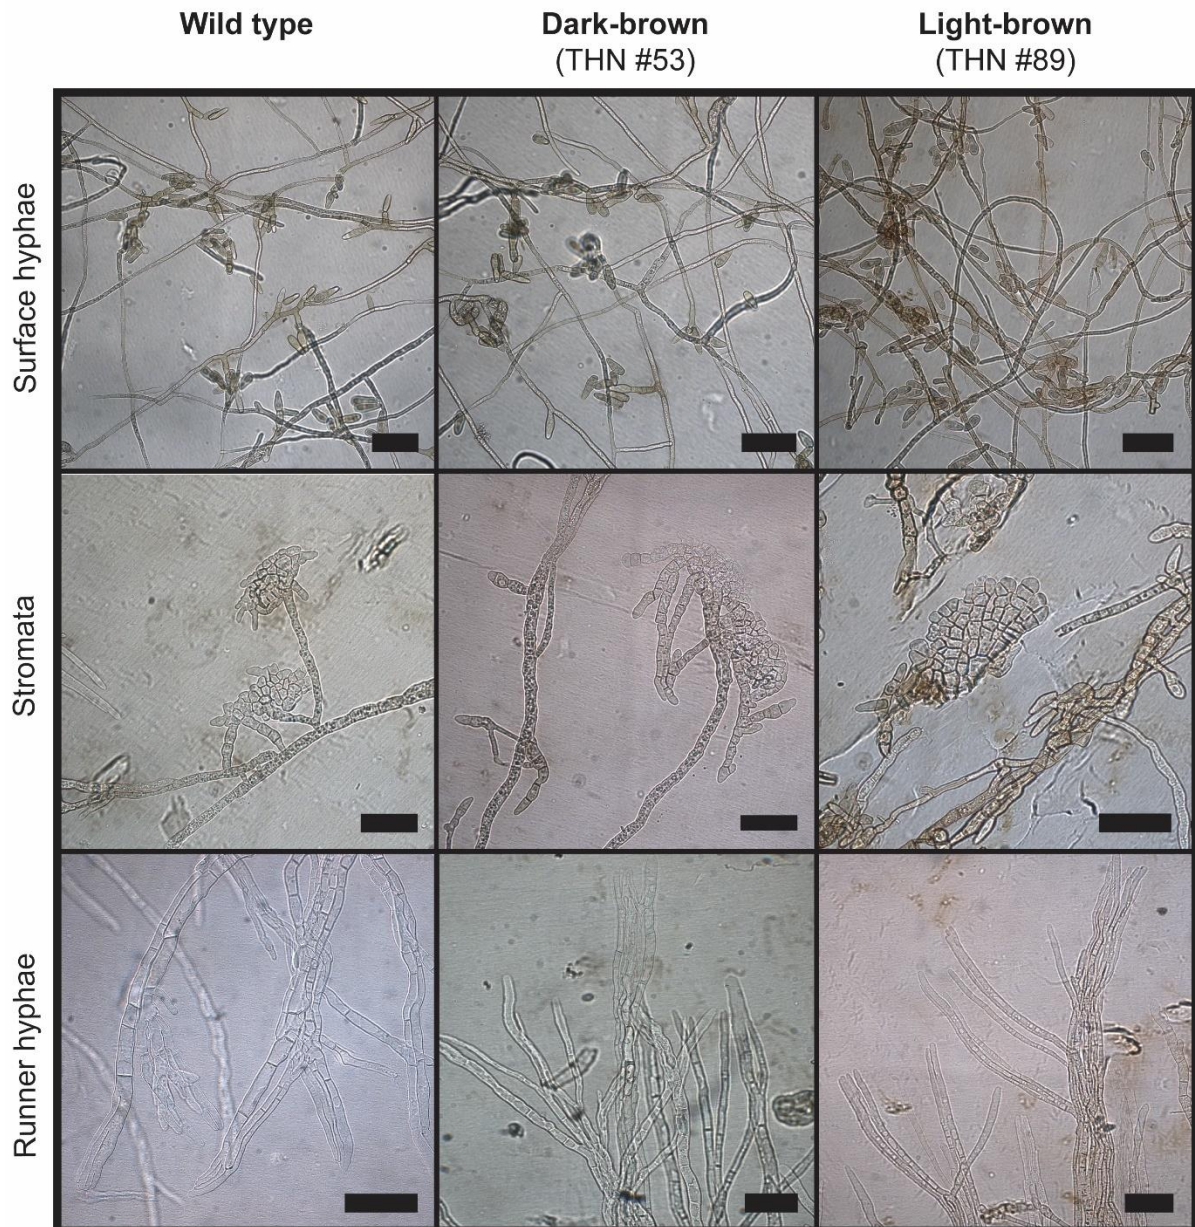

373

374 **Figure 5. In-culture phenotype of wild-type and CRISPR-Cas9 transformants of *Venturia***  
375 ***inaequalis* on and in a cellophane membrane.** The conidia of each strain were plated on a  
376 cellophane membrane overlaying potato-dextrose agar, followed by incubation at 22°C for  
377 10 days. Scale bar 50 µM. Pictures are representative of all *THN* mutants identified.

378

### 379 **Conclusions**

380 We have successfully applied CRISPR-Cas9 gene editing to the filamentous fungal pathogen,  
381 *V. inaequalis*, providing an opportunity for future studies to characterise gene functions

382 associated with the growth, reproduction, virulence and pathogenicity of this fungus. Given  
383 that the genomes of several other species from the *Venturia* genus have recently been  
384 sequenced (5, 48-53), this development will likely be useful for the functional characterization  
385 of genes in these species. Notably, genome sequencing has revealed that members of the  
386 *Venturia* genus contain large expanded families of putative effector genes that likely play an  
387 important role in host colonization (5). As the functional characterization of gene families is  
388 often hindered by functional redundancy between family members, and because the  
389 sequential deletion of family members using standard homologous recombination is limited  
390 by the number of selectable marker genes that are available, our finding that CRISPR-Cas9  
391 technology can be applied to *V. inaequalis* is also expected to greatly facilitate the functional  
392 characterization of effector gene families in the *Venturia* genus (i.e. through sequential gene  
393 deletion/disruption or simultaneous gene targeting (multiplexing)) (54).

394 In addition to applying CRISPR-Cas9 gene editing to *V. inaequalis*, we have developed  
395 a high-throughput screening protocol based on an HRM curve analysis for the identification  
396 of CRISPR-Cas9-generated mutants of this fungus with as little as one bp insertion or deletion.  
397 We have observed that this highly sensitive method can detect mutant DNA even when mixed  
398 in a 5:95 mutant:wt ratio, making it an excellent method for high-throughput screening, as  
399 mutants do not need to be single-spore purified prior to screening. This method will be of  
400 great value for the identification of mutants generated by CRISPR-Cas9 technology in different  
401 fungal species where the mutation efficiency is low.

402

## 403 **Methods**

### 404 **Strains used and growth conditions**

405 *V. inaequalis* isolate MNH120 from New Zealand (ICMP 13258; (55)) was used for CRISPR-Cas9  
406 experiments, and was grown on a cellophane membrane (Waugh Rubber Bands) overlaying  
407 PDA (Scharlab) at 22°C with a 16 h light/dark cycle. For long-term storage, *V. inaequalis*  
408 cellophane membranes were air-dried overnight and stored at –20°C. *Escherichia coli* strain  
409 DH5α (Thermo Fisher Scientific) was used for cloning, propagation and maintenance of  
410 Cas9HygAMA-*sgRNA* plasmids, and *E. coli* strain TG1 (kindly provided by Jasna Rakonjac,  
411 Massey University) for propagation of the Cas9HygAMAccdB plasmid, in lysogeny broth (LB)  
412 at 37°C and 180 rpm, or on LB agar at 37°C.

413

#### 414 **Construction of the Cas9HygAMAccdB plasmid**

415 The ANEp8\_Cas9\_LIC1 plasmid (35) was kindly provided by Concordia University and was  
416 adapted to contain a hygromycin cassette in place of the *pyrG* gene for selection. The 15.6-  
417 Kb ANEp8\_Cas9\_LIC1 plasmid was initially digested with the *NotI* restriction enzyme (New  
418 England Biolabs) to liberate a 5.3-Kb fragment containing the AMA1 cassette (purified by gel  
419 extraction using an Invitrogen PureLink Quick Gel Extraction Kit) and a 10.3-Kb fragment  
420 (purified by gel extraction) containing the *Cas9* and *pyrG* genes. Subsequent digestion of the  
421 10.3-Kb fragment with the *KpnI* restriction enzyme (New England Biolabs) liberated a 9-Kb  
422 Cas9 cassette (purified by gel extraction) containing the *Cas9* gene and removal of *pyrG*. To  
423 amplify the hygromycin resistance cassette, PCR was performed on the plasmid pDONR221-  
424 Hyg (56) with the restriction enzyme-adapted primers *KpnI* TrpC Hyg DONR R and *NotI* PgpDA  
425 Hyg pDONR F (Table 2), and the resulting product was digested with *KpnI* and *NotI* prior to  
426 ligation. The Cas9 (*NotI/KpnI*-digested) cassette and the hygromycin resistance (*NotI/KpnI*-  
427 digested) cassette were ligated with T4 ligase (Invitrogen) at 16°C overnight, creating the

428 Cas9Hyg plasmid. The Cas9Hyg plasmid was re-digested with *NotI* and treated with alkaline  
429 phosphatase (purified by gel extraction) before its T4 ligation with the AMA1 (*NotI*-digested)  
430 cassette, creating the Cas9HygAMA plasmid. Modification to the sgRNA protospacer was  
431 achieved through ligation-independent cloning (LIC) (35). A mock sgRNA protospacer,  
432 containing two *SapI* restriction enzyme sites, was cloned into the Cas9HygAMA plasmid,  
433 creating the Cas9HygAMASapI plasmid, and thus removing the need for the use of LIC with  
434 future protospacers. The primers required for the *SapI* insertion using the LIC method were  
435 SapI site CRISPR Fw P1, SapI site CRISPR Rev P1, Fw LIC2 and Rev LIC2 (Table 2). A *ccdB* lethal  
436 cassette was cloned between the two *SapI* (New England Biolabs) sites to aid in the efficiency  
437 of future protospacer cloning. To amplify the *ccdB* lethal cassette sequence (2 Kb), PCR was  
438 performed on the split marker vector pDONR-SM1 (57) with the *SapI* restriction enzyme-  
439 adapted primers SapI *ccdB* F and SapI *ccdB* R (Table 2). The resulting product was digested  
440 with *SapI* prior to its ligation with Cas9HygAMASapI (*SapI*-digested), creating the  
441 Cas9HygAMAccdB plasmid.

442

#### 443 **Protospacer design and cloning**

444 The *V. inaequalis THN* gene was screened for CRISPR-Cas9 target sites with the PAM (NGG)  
445 sequence using Geneious v.9.0.5 software (58). Two protospacer sequences targeting the first  
446 and second exon of the *THN* gene, respectively, with the best on-target and off-target scores  
447 were selected. The selected protospacers were predicted to have no off-target binding sites  
448 in the *V. inaequalis* MNH120 PacBio reference genome (unpublished, The New Zealand  
449 Institute for Plant and Food Research Limited) using BLASTn. Each protospacer, with the  
450 appropriate *SapI* overhang for Golden Gate cloning into the destination plasmid

451 Cas9HygAMAcdb, was ordered as a forward and reverse oligonucleotide from Integrated  
452 DNA Technologies. The protospacer #20 was generated by pre-annealing 40 ng of the forward  
453 (MR135) and reverse (MR136) oligonucleotides (Table 2), and protospacer #4 by pre-  
454 annealing 40 ng of the forward (MR137) and reverse (MR138) oligonucleotides (Table 2), in  
455 annealing buffer (10 mM Tris-HCl pH 8, 50 mM NaCl, 1 mM EDTA, pH 8) with the following  
456 thermocycler program: 5 min at 95°C, 20 sec at 92°C, followed by a decrease of 0.5°C each  
457 cycle for 140 cycles, and finally, 1 min at 25°C. Pre-annealed oligonucleotides were cloned  
458 into the Cas9HygAMAcdb plasmid using Golden Gate in association with the *SapI* restriction  
459 enzyme to generate sgRNA20 and sgRNA4. Golden Gate reactions were performed with the  
460 following thermocycler program: 1 min at 37°C, 1 min at 16°C for 30 cycles, followed by 5 min  
461 at 55°C and 5 min at 80°C. Transformants positive for each Cas9HygAMA-*sgRNA* plasmid were  
462 screened by colony PCR using Taq DNA polymerase (New England Biolabs) with the forward  
463 Cas9HygAMAcdb primer (MR139) and reverse sgRNA-specific primer (MR136 or MR138)  
464 (Table 2). Colony PCRs were carried out with the standard manufacturer's protocol. Sequence  
465 authenticity of the sgRNAs was confirmed by PCR amplicon sequencing, provided by the  
466 Massey Genome Service (Massey University, Palmerston North, New Zealand), using the  
467 MR139 forward Cas9HygAMAcdb primer.

468

#### 469 ***V. inaequalis* protoplast preparation and transformation**

470 Cas9HygAMA-*sgRNA* plasmids were introduced into *V. inaequalis* using a PEG-mediated  
471 protoplast transformation protocol. For this purpose, *V. inaequalis* was first grown on  
472 cellophane membranes overlaying PDA for 10–14 days. Fungal mycelia on top and inside  
473 cellophane membranes were then macerated in 1.5 ml microcentrifuge tubes using plastic

474 micropestles, transferred to a 250 ml Erlenmeyer flask containing 30 ml potato-dextrose  
475 broth (PDB) (Difco™), and cultured without shaking in the dark at 22°C for 48 h. After  
476 culturing, fungal material was harvested by centrifugation at 2,800 g for 20 min, washed three  
477 times with KC buffer (0.60 M KCl, 50 mM CaCl<sub>2</sub>·2H<sub>2</sub>O), with collection by centrifugation as  
478 above after each wash, and incubated in a 250 ml Erlenmeyer flask containing 10 g/L  
479 *Trichoderma harzianum* lysing enzymes (Sigma-Aldrich) in 50 mL KC buffer at 24°C and 80 rpm  
480 for 4-5 h. Finally, protoplasts were filtered through glass wool, and washed three times with  
481 KC buffer as above. Protoplasts were counted using a haemocytometer and re-suspended to  
482 a final concentration of 10<sup>4</sup>–10<sup>5</sup> protoplasts/ml.

483 Transformation was performed by mixing 100 µl of *V. inaequalis* protoplasts (10<sup>4</sup>-10<sup>5</sup>  
484 protoplasts/ml) with 100 µl of 25% PEG4000, 10 µg of circular Cas9HygAMA-*sgRNA* plasmid  
485 DNA, and 5 µl of 50 µM sterile spermidine. The protoplast-PEG mixture was then chilled on  
486 ice for 20 min and 500 µl of 25% PEG4000 gently added. Each protoplast-PEG mixture was  
487 plated across five Sucrose Hepes (SH) plates (0.6 M sucrose, 5 mM HEPES, 0.6% agar) and  
488 incubated at 20°C for 48 h. After incubation, protoplasts were overlaid with ½-strength PDA  
489 cooled-down to ~50°C and supplemented with 50 mg/ml hygromycin B (Merck).  
490 Transformants appearing on the PDA surface, between two and three weeks after  
491 transformation, were transferred to 16-well PDA plates supplemented with 50 mg/ml  
492 hygromycin B, and grown until abundantly sporulating. After mutant screening, selected  
493 transformants were single-spore purified. This was achieved by re-suspending a single colony  
494 in 500 µl sterile water and vortexing for 30 sec, with 100 µl streaked onto 4% water agar (WA)  
495 plates and the conidia germinated for 24 h. Following germination, one single germinated  
496 conidium was transferred to a cellophane membrane overlaying PDA for continued growth.

497



#### 498 ***V. inaequalis* genomic DNA extraction**

499 Two-to-four week-old cultures of *V. inaequalis* grown on cellophane membranes were freeze-  
500 dried and ground to a fine powder in liquid nitrogen with a pre-cooled mortar and pestle, and  
501 approximately 300 mg of powder was transferred to a 1.5 ml microcentrifuge tube. To this, 1  
502 ml of DNA extraction buffer (0.5 M NaCl, 10 mM Tris-HCl, 10 mM EDTA, 1% SDS, pH 7.5) was  
503 added, vortexed, and incubated at 65°C for 30 min, followed by 2 min incubation at room  
504 temperature (RT). Fungal material was collected by centrifugation at 16,000 *g* for 2 min and  
505 800 µl of supernatant was transferred to a fresh 1.5 ml microcentrifuge tube. Then, 4 µl of  
506 RNase A (20 mg/ml) (Invitrogen) was added and samples were incubated at 37°C for 15 min.  
507 After incubation, a 0.5 volume of phenol and a 0.5 volume of chloroform:isoamyl alcohol  
508 (24:1) were added and samples were centrifuged for 5 min at 16,000 *g*. The aqueous phase  
509 was then transferred to a fresh 1.5 ml microcentrifuge tube and 1 volume of  
510 phenol:chloroform (1:1) was added. Samples were again centrifuged at 16,000 *g* for 5 min  
511 and the supernatant transferred to a new 1.5 ml microcentrifuge tube. The  
512 chloroform:isoamyl alcohol (24:1) step was then repeated and the supernatant was  
513 transferred to a new 1.5 ml microcentrifuge tube. Genomic DNA was precipitated by the  
514 addition of a 0.1 volume of 3 M sodium acetate (pH 5.2) and two volumes of 95% ethanol.  
515 Samples were mixed by inversion and incubated overnight at –20°C. Following incubation, the  
516 precipitated DNA was collected by centrifugation at 16,000 *g* for 30 min, and the supernatant  
517 was decanted. The genomic DNA pellet was then washed with 200 µl of 70% ethanol and  
518 collected by centrifugation at 16,000 *g* for 5 min. Finally, the genomic DNA pellet was air-  
519 dried for 15-30 min and suspended in 50 µl of MilliQ water.

520

## 521 High resolution melting curve analysis

522 A positive control for the HRM curve analysis was created by site-directed mutagenesis. First,  
523 primers MR161 and MR162 (Table 2) were phosphorylated with T4 Polynucleotide Kinase  
524 (New England Biolabs) at 37°C for 1 h in a 4.5 µl reaction volume with 10 µM primer, 10x T4  
525 ligase buffer (New England Biolabs) and 0.4 µl of T4 polynucleotide kinase (New England  
526 Biolabs). The *THN* gene was amplified with the phosphorylated primers MR161-MR162 using  
527 Phusion Flash High-Fidelity PCR Master Mix (Thermo Fisher Scientific) and purified using an  
528 OMEGA Gel Extraction kit. The pICH41021 plasmid was digested with the *Sma*I restriction  
529 enzyme in a 50 µl volume for 2 h at 37°C. Digested plasmid was then de-phosphorylated with  
530 Shrimp Alkaline Phosphatase (rSAP) (New England Biolabs) for 30 min at 37°C, with the  
531 reaction subsequently heat-inactivated at 65°C for 5 min. Finally, the *THN* gene was ligated to  
532 pICH41021 in a 3:1 molar ratio using T4 Ligase (New England Biolabs) at 4°C overnight and  
533 transformed by heat shock into chemically competent *E. coli* cells. Positive transformants  
534 were confirmed by colony PCR. Next, the pICH41021-*THN* plasmid was amplified with  
535 overlapping primers MR182 and MR183 to introduce a mutation in the *THN* gene that  
536 substituted a thymine and cytosine at nucleotide positions 26 and 27 for two guanines. The  
537 resulting re-circularized pICH41021-*THN*<sub>TC(26/27)GG</sub> plasmid was confirmed by sequencing.

538 Two sets of primers (MR170-MR171 and MR172-MR173) were designed with  
539 Geneious v.9.0.5 software for use in the HRM curve analysis (Table 2). These primers were  
540 designed to amplify the DNA region in the *THN* gene recognized by the sgRNA (and thus,  
541 edited by the Cas9 endonuclease), with an amplicon size of 123 bp (MR172-MR173) and 230  
542 bp (MR170-MR171). Primers were tested to be specific and suitable for HRM by performing

543 an HRM curve analysis with DNA standards (wt and engineered positive control), as described  
544 below, with the resulting amplicons resolved by electrophoresis on a 1.5% TAE gel.

545 The HRM curve analysis was performed using a LightCycler 480 Instrument (Roche)  
546 with the AccuMelt HRM SuperMix fluorescent dye (DNAture) in a 20  $\mu$ L reaction with 1x  
547 AccuMelt HRM SuperMix, 300 nM forward primers (MR172), 300 nM reverse primer (MR173)  
548 and 1.5 ng of genomic DNA template or 0.01 ng of the puc19-THN<sub>TC(26/27)GG</sub> plasmid. At least  
549 two technical replicates were performed for each sample. The qPCR amplification was  
550 performed with the following program: initial denaturation of 5 min at 95°C, followed by 40  
551 cycles of 95°C for 8 sec, 60°C for 15 sec, 70°C for 20 sec, with one fluorescence reading per  
552 annealing step. The qPCR was followed by a melting program consisting of 95°C for 1 min,  
553 40°C for 1 min, 76°C for 1 sec, and then a continuous 92°C with 25 acquisitions per degree  
554 followed by a cooling step of 40°C for 30 sec. The HRM curve data were analysed with the  
555 LightCycler 480 gene scanning software. To confirm mutants identified by HRM, the *THN* gene  
556 was amplified with Phusion Flash High-Fidelity PCR Master Mix using primers MR161 and  
557 MR162, with the resultant PCR amplicons gel-purified as above and sequenced using primer  
558 MR161.

559

#### 560 **Ethics approval and consent to participate**

561 Not applicable.

#### 562 **Availability of data and materials**

563 No substantive datasets were generated during the course of this study and all data are  
564 presented within.

565 **Competing interests**

566 The authors declare that they have no competing interests.

567 **Funding**

568 MRF and CHM are supported by the Marsden Fund Council from Government funding (project  
569 ID 17-MAU-100), managed by Royal Society Te Apārangi. SA and JKB received funding from  
570 The New Zealand Institute for Plant and Food Research Limited, Strategic Science Investment  
571 Fund, Project number: 12070. DH, JS, RDJ and LJJ are supported by the MBIE partnership  
572 programme: Novel variation for a persistent problem (project ID C10X1902). AgResearch work  
573 was also supported through a QEII technicians' study award (to JS) and the New Zealand  
574 Strategic Science Investment Fund (SSIF) contract A20067.

575 **Author contributions**

576 MR, JKB, KMP, REB, RDJ, LJJ and CHM conceived the project. MR, SA, DH and JS performed  
577 the research. All authors contributed to the writing and reviewing of the manuscript.

578 **Acknowledgements**

579 We thank Professor Adrian Tsang (Center for Functional and Structural Genomics Biology,  
580 Concordia University, Canada) for hosting JS and providing the original CRISPR-Cas9 vectors.  
581 We also thank Natasha Forester and Pranav Chettri for useful discussions around vector  
582 modification.

583

584

585

586 **References**

- 587 1. Bowen JK, Mesarich CH, Bus VG, Beresford RM, Plummer KM, Templeton MD. *Venturia*  
588 *inaequalis*: the causal agent of apple scab. *Molecular Plant Pathology*. 2011;12(2):105-  
589 22.
- 590 2. Le Cam B, Sargent D, Gouzy J, Amselem J, Bellanger M-N, Bouchez O, et al. Population  
591 genome sequencing of the scab fungal species *Venturia inaequalis*, *Venturia pirina*,  
592 *Venturia aucupariae* and *Venturia asperata*. *G3: Genes, Genomes, Genetics*.  
593 2019;9(8):2405-14.
- 594 3. González-Domínguez E, Armengol J, Rossi V. Biology and epidemiology of *Venturia*  
595 species affecting fruit crops: A Review. *Frontiers in Plant Science*. 2017;8(1496).
- 596 4. Jha G, Thakur K, Thakur P. The *Venturia* apple pathosystem: pathogenicity  
597 mechanisms and plant defense responses. *Journal of Biomedicine and Biotechnology*.  
598 2009;2009:680160.
- 599 5. Deng CH, Plummer KM, Jones DAB, Mesarich CH, Shiller J, Taranto AP, et al.  
600 Comparative analysis of the predicted secretomes of Rosaceae scab pathogens  
601 *Venturia inaequalis* and *V. pirina* reveals expanded effector families and putative  
602 determinants of host range. *BMC Genomics*. 2017;18(1):339.
- 603 6. Lichtner FJ, Jurick WM, Ayer KM, Gaskins VL, Villani SM, Cox KD. A genome resource  
604 for several North American *Venturia inaequalis* isolates with multiple fungicide  
605 resistance phenotypes. *Phytopathology*. 2020;110(3):544-6.
- 606 7. Papp D, Singh J, Gadoury D, Khan A. New North American isolates of *Venturia*  
607 *inaequalis* can overcome apple scab resistance of *Malus floribunda* 821. *Plant Disease*.  
608 2020;104(3):649-55.

- 609 8. Passey TAJ, Armitage AD, Xu X. Annotated draft genome sequence of the apple scab  
610 pathogen *Venturia inaequalis*. *Microbiology Resource Announcements*.  
611 2018;7(12):e01062-18.
- 612 9. Passey TAJ, Armitage AD, Sobczyk MK, Shaw MW, Xu X. Genomic sequencing indicates  
613 non-random mating of *Venturia inaequalis* in a mixed cultivar orchard. *Plant*  
614 *Pathology*. 2020;69(4):669-76.
- 615 10. Fitzgerald AM, Mudge AM, Gleave AP, Plummer KM. *Agrobacterium* and PEG-  
616 mediated transformation of the phytopathogen *Venturia inaequalis*. *Mycological*  
617 *Research*. 2003;107(7):803-10.
- 618 11. Bowen JK, Mesarich CH, Rees-George J, Cui W, Fitzgerald A, Win J, et al. Candidate  
619 effector gene identification in the ascomycete fungal phytopathogen *Venturia*  
620 *inaequalis* by expressed sequence tag analysis. *Molecular Plant Pathology*.  
621 2009;10(3):431-48.
- 622 12. Kucheryava N, Bowen JK, Sutherland PW, Conolly JJ, Mesarich CH, Rikkerink EH, et al.  
623 Two novel *Venturia inaequalis* genes induced upon morphogenetic differentiation  
624 during infection and *in vitro* growth on cellophane. *Fungal Genetics and Biology*.  
625 2008;45(10):1329-39.
- 626 13. Mesarich CH, Schmitz M, Tremouilhac P, McGillivray DJ, Templeton MD, Dingley AJ.  
627 Structure, dynamics and domain organization of the repeat protein Cin1 from the  
628 apple scab fungus. *Biochimica Biophysica Acta Proteins and Proteomics*.  
629 2012;1824(10):1118-28.
- 630 14. Shiller J, Van de Wouw AP, Taranto AP, Bowen JK, Dubois D, Robinson A, et al. A large  
631 family of *AvrLm6-like* genes in the apple and pear scab pathogens, *Venturia inaequalis*  
632 and *Venturia pirina*. *Frontiers in Plant Science*. 2015;6(980).

- 633 15. Feurtey A, Guitton E, De Gracia Coquerel M, Duvaux L, Shiller J, Bellanger M-N, et al.  
634 Threat to Asian wild apple trees posed by gene flow from domesticated apple trees  
635 and their “pestified” pathogens. *Molecular Ecology*. 2020;29(24):4925-41.
- 636 16. Fitzgerald A, Van Kan JA, Plummer KM. Simultaneous silencing of multiple genes in the  
637 apple scab fungus, *Venturia inaequalis*, by expression of RNA with chimeric inverted  
638 repeats. *Fungal Genetics and Biology*. 2004;41(10):963-71.
- 639 17. Salame TM, Ziv C, Hadar Y, Yarden O. RNAi as a potential tool for biotechnological  
640 applications in fungi. *Applied Microbiology and Biotechnology*. 2011;89(3):501-12.
- 641 18. Nakayashiki H, Nguyen QB. RNA interference: roles in fungal biology. *Current Opinion*  
642 *in Microbiology*. 2008;11(6):494-502.
- 643 19. Doudna JA, Charpentier E. The new frontier of genome engineering with CRISPR-Cas9.  
644 *Science*. 2014;346(6213):1258096.
- 645 20. Schuster M, Kahmann R. CRISPR-Cas9 genome editing approaches in filamentous fungi  
646 and oomycetes. *Fungal Genetics and Biology*. 2019;130:43-53.
- 647 21. Fang Y, Tyler BM. Efficient disruption and replacement of an effector gene in the  
648 oomycete *Phytophthora sojae* using CRISPR/Cas9. *Molecular Plant Pathology*.  
649 2016;17(1):127-39.
- 650 22. Foster AJ, Martin-Urdiroz M, Yan X, Wright HS, Soanes DM, Talbot NJ. CRISPR-Cas9  
651 ribonucleoprotein-mediated co-editing and counterselection in the rice blast fungus.  
652 *Scientific Reports*. 2018;8(1):14355.
- 653 23. Schuster M, Schweizer G, Reissmann S, Kahmann R. Genome editing in *Ustilago*  
654 *maydis* using the CRISPR–Cas system. *Fungal Genetics and Biology*. 2016;89:3-9.
- 655 24. Idnurm A, Urquhart AS, Vummadi DR, Chang S, Van de Wouw AP, López-Ruiz FJ.  
656 Spontaneous and CRISPR/Cas9-induced mutation of the osmosensor histidine kinase

- 657 of the canola pathogen *Leptosphaeria maculans*. *Fungal Biology and Biotechnology*.  
658 2017;4:12.
- 659 25. Sander JD, Joung JK. CRISPR-Cas systems for editing, regulating and targeting  
660 genomes. *Nature Biotechnology*. 2014;32(4):347-55.
- 661 26. Krappmann S. Gene targeting in filamentous fungi: the benefits of impaired repair.  
662 *Fungal Biology Reviews*. 2007;21(1):25-9.
- 663 27. Vouillot L, Th  lie A, Pollet N. Comparison of T7E1 and surveyor mismatch cleavage  
664 assays to detect mutations triggered by engineered nucleases. *G3: Genes, Genomes,  
665 Genetics*. 2015;5(3):407-15.
- 666 28. Zhu X, Xu Y, Yu S, Lu L, Ding M, Cheng J, et al. An efficient genotyping method for  
667 genome-modified animals and human cells generated with CRISPR/Cas9 system.  
668 *Scientific Reports*. 2014;4(1):6420.
- 669 29. Denbow CJ, Lapins S, Dietz N, Scherer R, Nimchuk ZL, Okumoto S. Gateway-compatible  
670 CRISPR-Cas9 vectors and a rapid detection by high-resolution melting curve analysis.  
671 *Frontiers in Plant Science*. 2017;8(1171).
- 672 30. Reed GH, Wittwer CT. Sensitivity and specificity of single-nucleotide polymorphism  
673 scanning by high-resolution melting analysis. *Clinical Chemistry*. 2004;50(10):1748-54.
- 674 31. Simko I. High-resolution DNA melting analysis in plant research. *Trends in Plant  
675 Science*. 2016;21(6):528-37.
- 676 32. Wittwer CT. High-resolution DNA melting analysis: advancements and limitations.  
677 *Human Mutation*. 2009;30(6):857-9.
- 678 33. Dufresne SD, Belloni DR, Wells WA, Tsongalis GJ. *BRCA1* and *BRCA2* mutation  
679 screening using SmartCycler II high-resolution melt curve analysis. *Archives of  
680 Pathology & Laboratory Medicine*. 2006;130(2):185-7.



- 681 34. Li R, Ba Y, Song Y, Cui J, Zhang X, Zhang D, et al. Rapid and sensitive screening and  
682 identification of CRISPR/Cas9 edited rice plants using quantitative real-time PCR  
683 coupled with high resolution melting analysis. *Food Control*. 2020;112:107088.
- 684 35. Song L, Ouedraogo J-P, Kolbusz M, Nguyen TTM, Tsang A. Efficient genome editing  
685 using tRNA promoter-driven CRISPR/Cas9 gRNA in *Aspergillus niger*. *PLoS One*.  
686 2018;13(8):e0202868-e.
- 687 36. Aleksenko A, Clutterbuck AJ. Autonomous plasmid replication in *Aspergillus nidulans*:  
688 AMA1 and MATE Elements. *Fungal Genetics and Biology*. 1997;21(3):373-87.
- 689 37. Nødvig CS, Nielsen JB, Kogle ME, Mortensen UH. A CRISPR-Cas9 system for genetic  
690 engineering of filamentous fungi. *PLoS One*. 2015;10(7):e0133085.
- 691 38. Doench JG, Hartenian E, Graham DB, Tothova Z, Hegde M, Smith I, et al. Rational  
692 design of highly active sgRNAs for CRISPR-Cas9-mediated gene inactivation. *Nature*  
693 *Biotechnology*. 2014;32(12):1262-7.
- 694 39. Hamada W, Reignault P, Bompeix G, Boccara M. Transformation of *Botrytis cinerea*  
695 with the hygromycin B resistance gene, *hph*. *Current Genetics*. 1994;26(3):251-5.
- 696 40. Sánchez-Torres P, González R, Pérez-González JA, González-Candelas L, Ramón D.  
697 Development of a transformation system for *Trichoderma longibrachiatum* and its use  
698 for constructing multicopy transformants for the *egl1* gene. *Applied Microbiology and*  
699 *Biotechnology*. 1994;41(4):440-6.
- 700 41. DiCarlo JE, Norville JE, Mali P, Rios X, Aach J, Church GM. Genome engineering in  
701 *Saccharomyces cerevisiae* using CRISPR-Cas systems. *Nucleic Acids Research*.  
702 2013;41(7):4336-43.

- 703 42. Khan H, McDonald MC, Williams SJ, Solomon PS. Assessing the efficacy of CRISPR/Cas9  
704 genome editing in the wheat pathogen *Parastagonospora nodorum*. *Fungal Biology and*  
705 *Biotechnology*. 2020;7(1):4.
- 706 43. Shi TQ, Liu GN, Ji RY, Shi K, Song P, Ren LJ, et al. CRISPR/Cas9-based genome editing of  
707 the filamentous fungi: the state of the art. *Applied Microbiology and Biotechnology*.  
708 2017;101(20):7435-43.
- 709 44. Nødvig CS, Hoof JB, Kogle ME, Jarczyńska ZD, Lehmebeck J, Klitgaard DK, et al. Efficient  
710 oligo nucleotide mediated CRISPR-Cas9 gene editing in *Aspergilli*. *Fungal Genetics and*  
711 *Biology*. 2018;115:78-89.
- 712 45. Słomka M, Sobalska-Kwapis M, Wachulec M, Bartosz G, Strapagiel D. High Resolution  
713 Melting (HRM) for high-throughput genotyping—Limitations and caveats in practical  
714 case studies. *International Journal of Molecular Sciences*. 2017;18(11):2316.
- 715 46. Morgens DW, Wainberg M, Boyle EA, Ursu O, Araya CL, Tsui CK, et al. Genome-scale  
716 measurement of off-target activity using Cas9 toxicity in high-throughput screens.  
717 *Nature Communications*. 2017;8(1):15178.
- 718 47. Al Abdallah Q, Souza ACO, Martin-Vicente A, Ge W, Fortwendel JR. Whole-genome  
719 sequencing reveals highly specific gene targeting by in vitro assembled Cas9-  
720 ribonucleoprotein complexes in *Aspergillus fumigatus*. *Fungal Biology and*  
721 *Biotechnology*. 2018;5(1):11.
- 722 48. Chen C, Bock CH, Wood BW. Draft genome sequence of *Venturia carpophila*, the  
723 causal agent of peach scab. *Standards in Genomic Sciences*. 2017;12:68.
- 724 49. Cooke IR, Jones D, Bowen JK, Deng C, Faou P, Hall NE, et al. Proteogenomic analysis of  
725 the *Venturia pirina* (Pear Scab Fungus) secretome reveals potential effectors. *Journal*  
726 *of Proteome Research*. 2014;13(8):3635-44.

- 727 50. Jaber MY, Bao J, Gao X, Zhang L, He D, Wang X, et al. Genome sequence of *Venturia*  
728 *oleaginea*, the causal agent of olive leaf scab. *Molecular Plant-Microbe Interactions*.  
729 2020;33(9):1095-7.
- 730 51. Johnson S, Jones D, Thrimawithana AH, Deng CH, Bowen JK, Mesarich CH, et al. Whole  
731 genome sequence resource of the Asian pear scab pathogen *Venturia nashicola*.  
732 *Molecular Plant-Microbe Interactions*. 2019;32(11):1463-7.
- 733 52. Winter DJ, Charlton ND, Krom N, Shiller J, Bock CH, Cox MP, et al. Chromosome-Level  
734 reference genome of *Venturia effusa*, causative agent of pecan scab. *Molecular Plant-*  
735 *Microbe Interactions*. 2020;33(2):149-52.
- 736 53. Prokchorchik M, Won K, Lee Y, Choi ED, Segonzac C, Sohn KH. High contiguity whole  
737 genome sequence and gene annotation resource for two *Venturia nashicola* isolates.  
738 *Molecular Plant-Microbe Interactions*. 2019;32(9):1091-4.
- 739 54. Schuster M, Schweizer G, Kahmann R. Comparative analyses of secreted proteins in  
740 plant pathogenic smut fungi and related basidiomycetes. *Fungal Genetics and Biology*.  
741 2018;112:21-30.
- 742 55. Stehmann C, Pennycook S, Plummer KM. Molecular identification of a sexual  
743 interloper: the pear pathogen, *Venturia pirina*, has sex on apple. *Phytopathology*.  
744 2001;91(7):633-41.
- 745 56. Fleetwood DJ, Scott B, Lane GA, Tanaka A, Johnson RD. A complex ergovaline gene  
746 cluster in *Epichloë* endophytes of grasses. *Applied and Environmental Microbiology*.  
747 2007;73(8):2571.
- 748 57. Rahnama M, Forester N, Ariyawansa KGSU, Voisey CR, Johnson LJ, Johnson RD, et al.  
749 Efficient targeted mutagenesis in *Epichloë festucae* using a split marker system.  
750 *Journal of Microbiological Methods*. 2017;134:62-5.

751 58. Kearse M, Moir R, Wilson A, Stones-Havas S, Cheung M, Sturrock S, et al. Geneious  
752 Basic: an integrated and extendable desktop software platform for the organization  
753 and analysis of sequence data. *Bioinformatics*. 2012;28(12):1647-9.  
754
