# Supplementary material for: CRISPR-Cas9 gene editing and rapid detection of gene-edited mutants using high-resolution melting in the apple scab fungus, Venturia inaequalis
Source: bioRxiv or medRxiv preprint supplement (doi:10.1101/2021.02.04.428760), 2021-02-05
Supplement: Supplementary file [file media-1.pdf]

**A.**

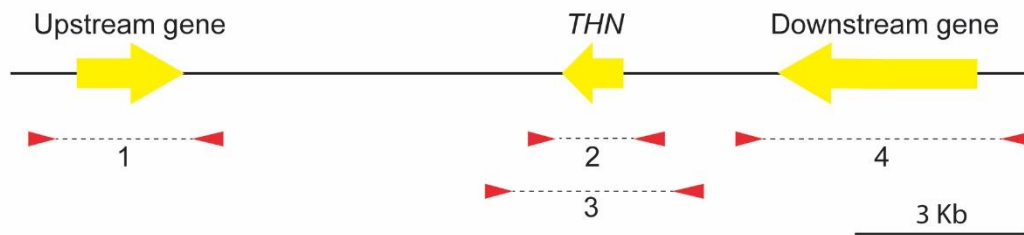

**B.**

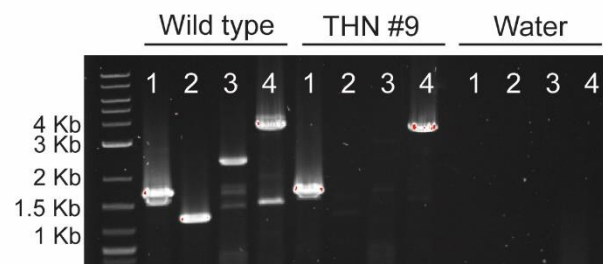

**Figure S1. A large deletion event has potentially occurred at the *THN* locus in mutant **THN #9**.** **A.** Schematic representation of the *trihydroxynaphthalene reductase* (*THN*) gene locus in the *Venturia inaequalis* MNH120 genome. Arrows: primer binding site, dashed lines: amplicon. **B.** Conventional PCR of *THN* and its neighbouring genes using wild type genomic DNA, THN #9 genomic DNA and water as a negative control. PCR amplicons were resolved by electrophoresis on a 1% TBE gel. Marker: 1 Kb plus DNA ladder. 1. MR204-MR205: upstream gene; 2. MR161-MR162: *THN*; 3. MR184-MR185: *THN*; 4. MR252-MR253: downstream gene.
