# Supplementary material for: CRISPR-Cas9 gene editing and rapid detection of gene-edited mutants using high-resolution melting in the apple scab fungus, Venturia inaequalis
Source: bioRxiv or medRxiv preprint supplement (doi:10.1101/2021.02.04.428760), 2021-02-05
Supplement: Supplementary file [file media-2.pdf]

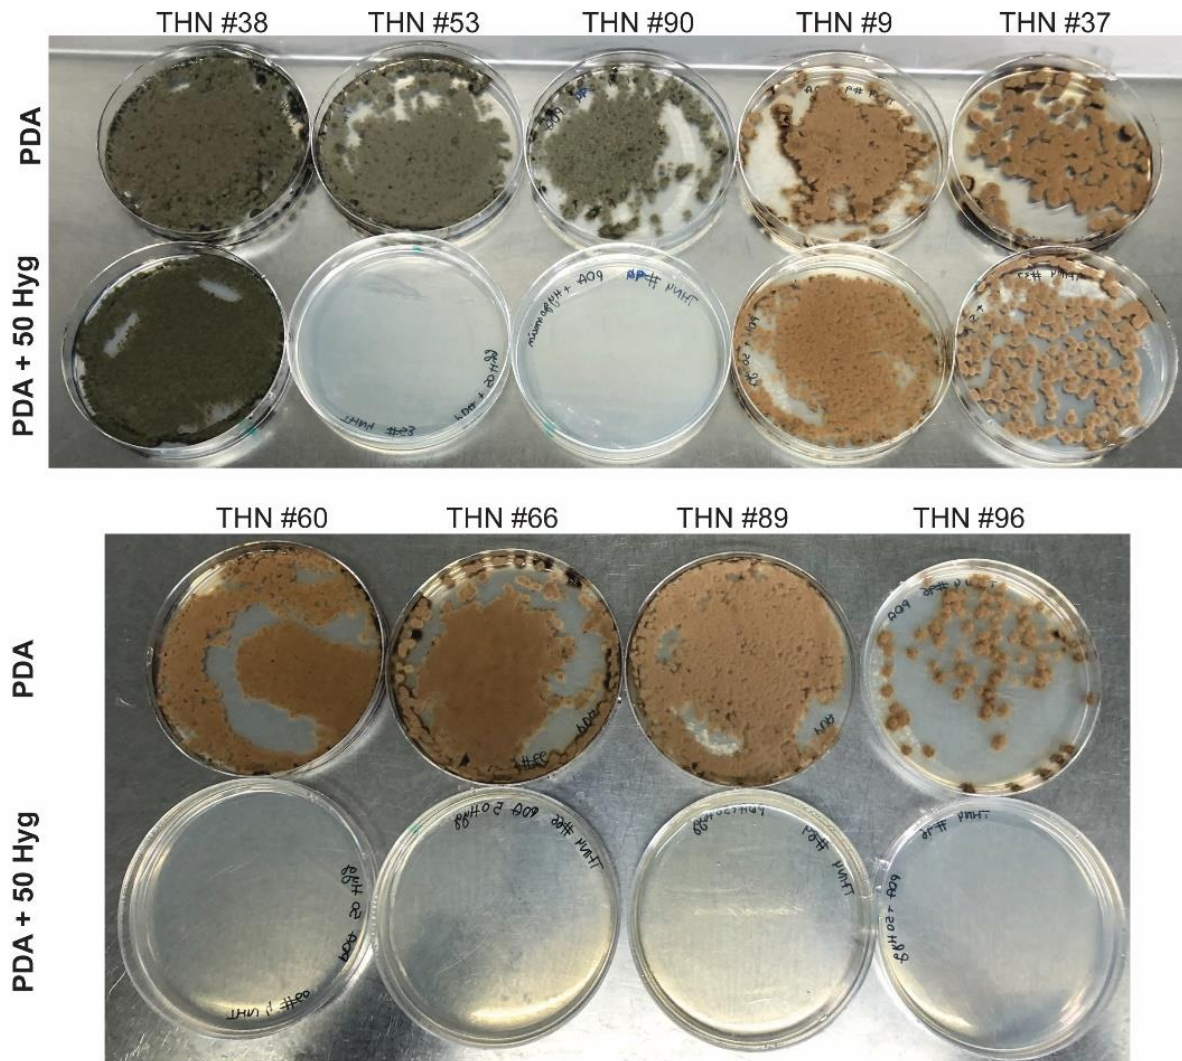

**Figure S2. Loss of the autonomously replicating Cas9HygAMA-sgRNA plasmid by CRISPR-Cas9 *THN* transformants of *Venturia inaequalis*.** Conidia of each transformant were plated on a cellophane membrane overlaying potato-dextrose agar (PDA) or a cellophane membrane overlaying PDA supplemented with 50  $\mu\text{g}/\text{ml}$  hygromycin B (Hyg), followed by incubation at 22°C for 14 days.
